# Supplementary material for: Multilayered frequency-selective and high-performance electromagnetic interference shielding materials derived from waste polyurethane foam
Source: Royal Society of Chemistry journal article supplement (doi:10.1039/d4su00181h), 2024-01-01
Supplement: d4su00181h1.zip [file d4su00181h1.zip]

## Sheet: Sheet1
	thickness（mm）		Square resistance (ohm/square)				Electrical conductivity（S/m）
			1	2	3		1	2	3
1	0.25		900.233	921.787	880.923		4.44329	4.3394	4.54069
2	0.25		280.513	257.364	240.866		14.2596	15.5422	16.6067
3	0.25		107.462	98.711	103.673		37.2225	40.5223	38.5829
4	0.25		62.317	56.354	65.817		64.1879	70.9799	60.7746
